# Supplementary material for: Metagenomics revealing molecular profiling of community structure and metabolic pathways in natural hot springs of the Sikkim Himalaya
Source: PubMed Central journal article supplement (PMC7418396; doi:10.1186/s12866-020-01923-3), 2020-08-10
Supplement: 12866_2020_1923_MOESM1_ESM.pdf [file 12866_2020_1923_MOESM1_ESM.pdf]

**A**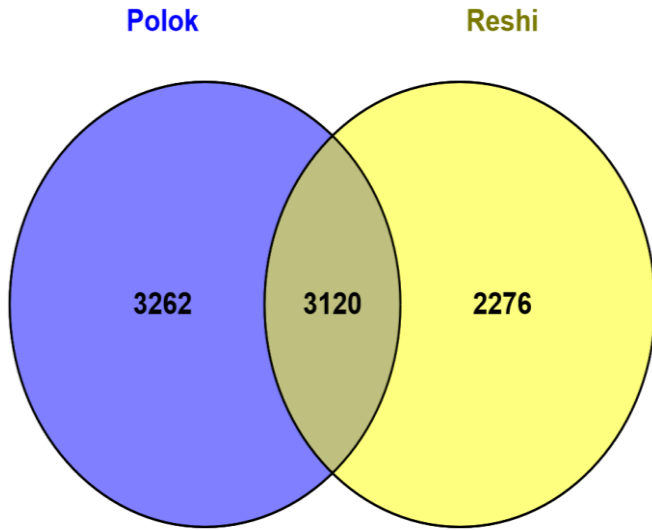**B**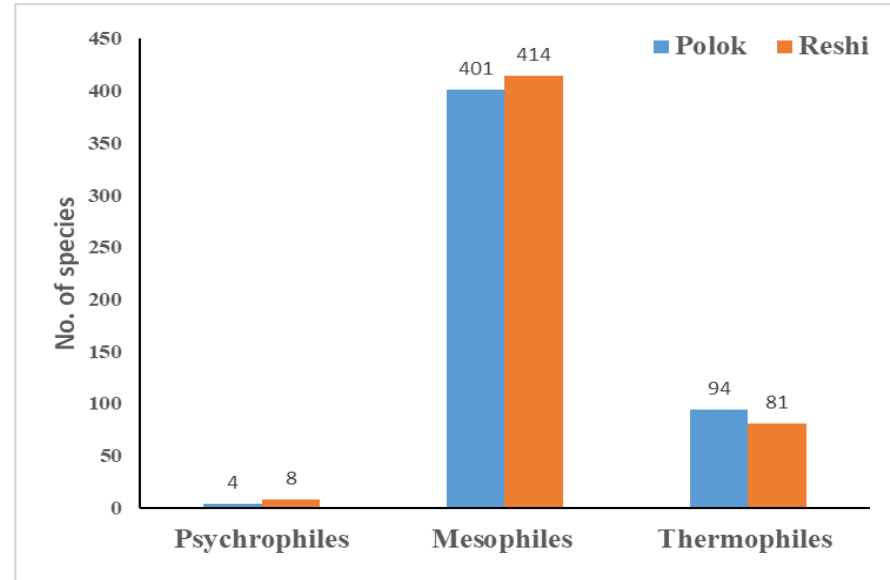

**Fig. S1.** (A) Species count commonly and exclusively present in Polok and Reshi, (B) Total number of mesophiles, thermophiles and psychrophiles in Polok and Reshi.

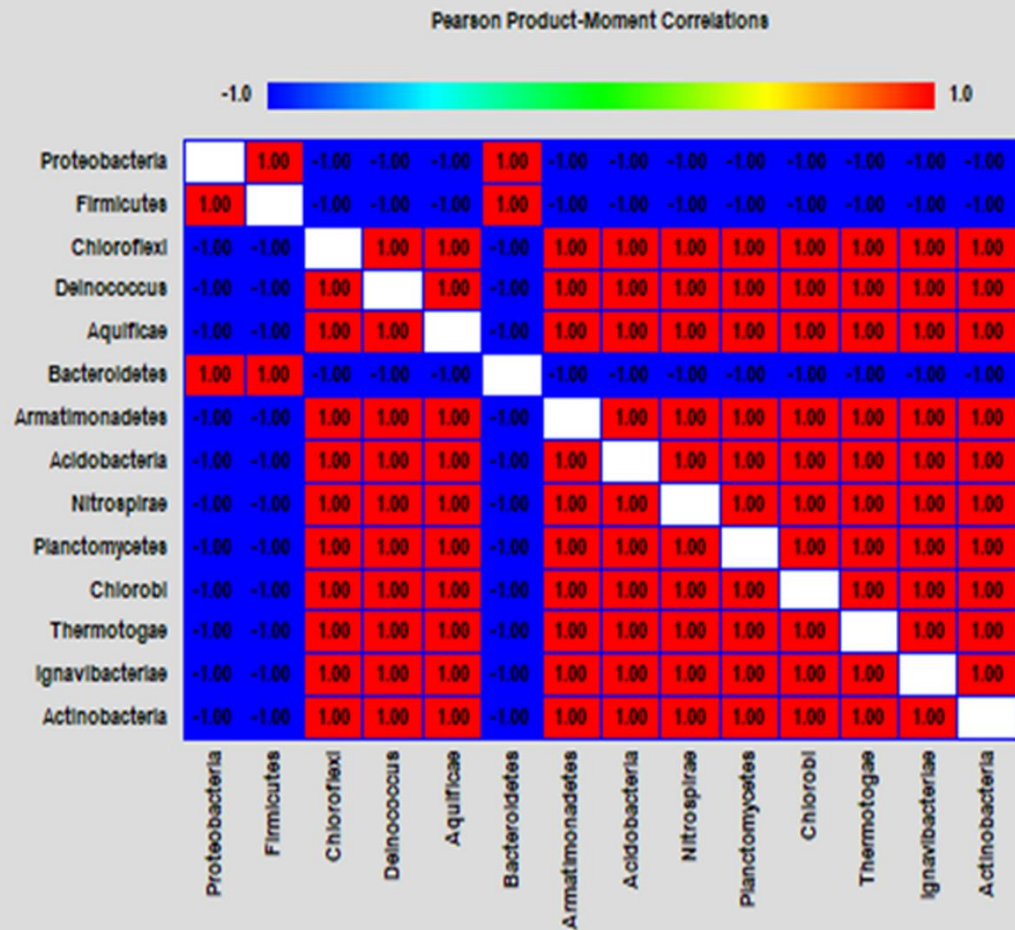

Fig. S2. Pearson product moment correlation plot at phylum level.

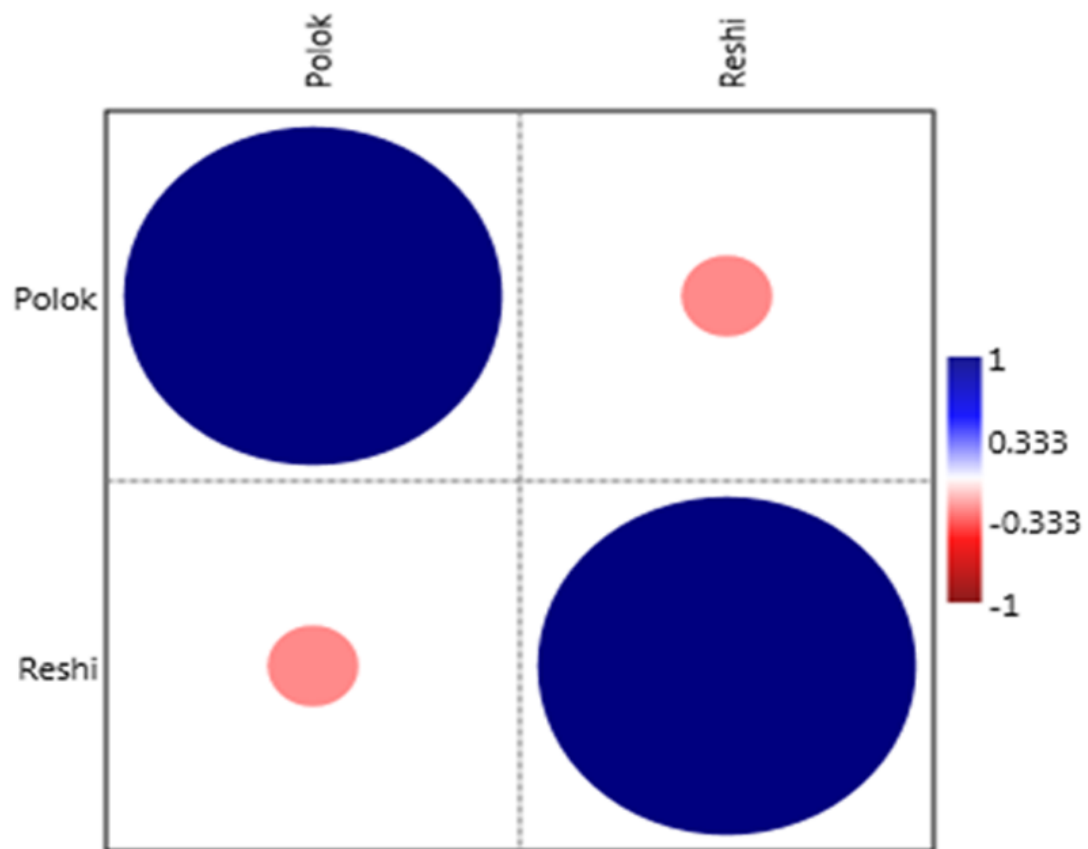

**Fig. S3.** Relative abundance of microbial species in Polok and Reshi hot springs.

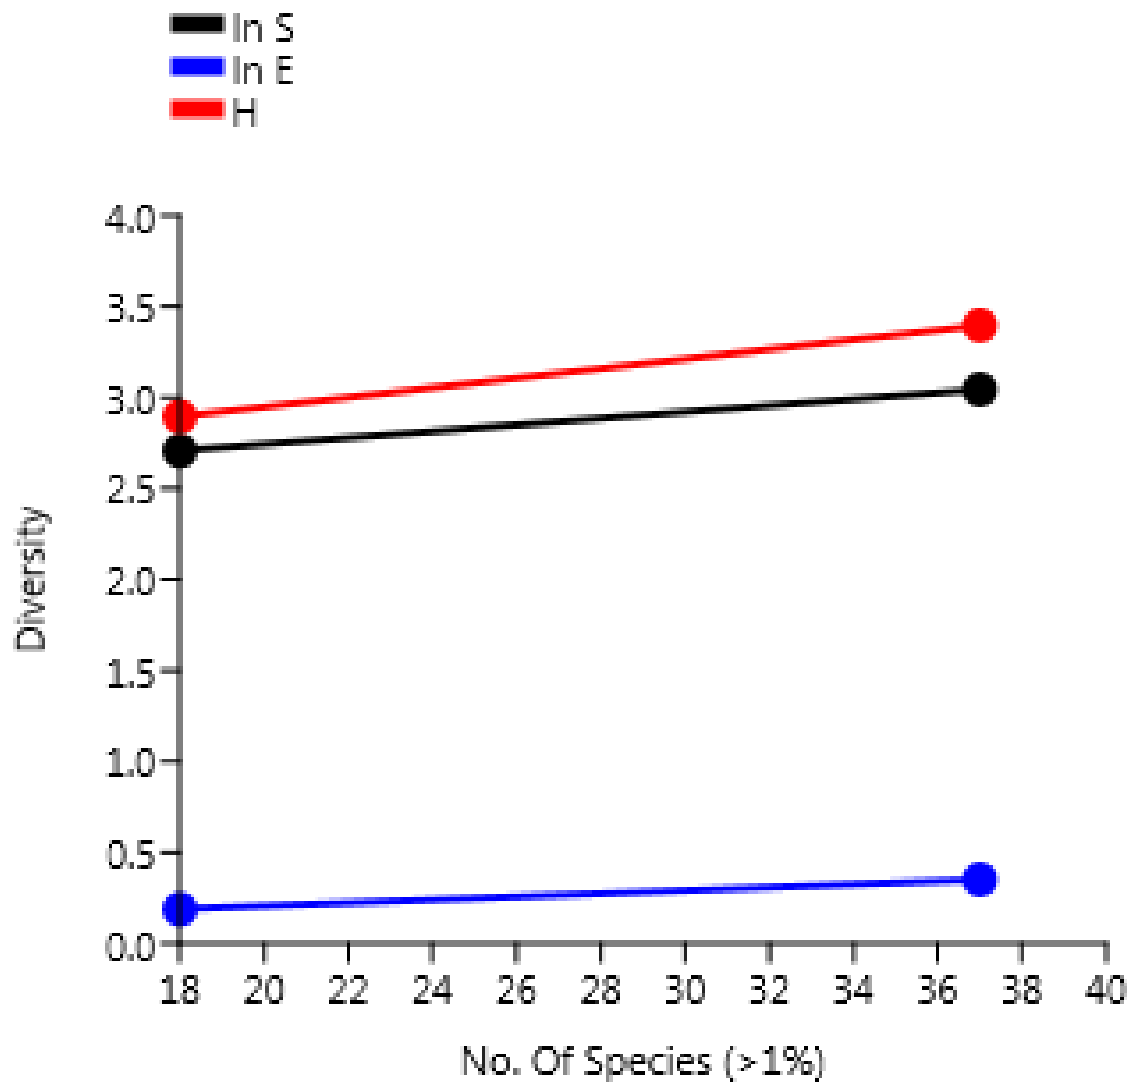

**Fig. S4.** SHE analysis of microbial species distribution in Polok and Reshi.

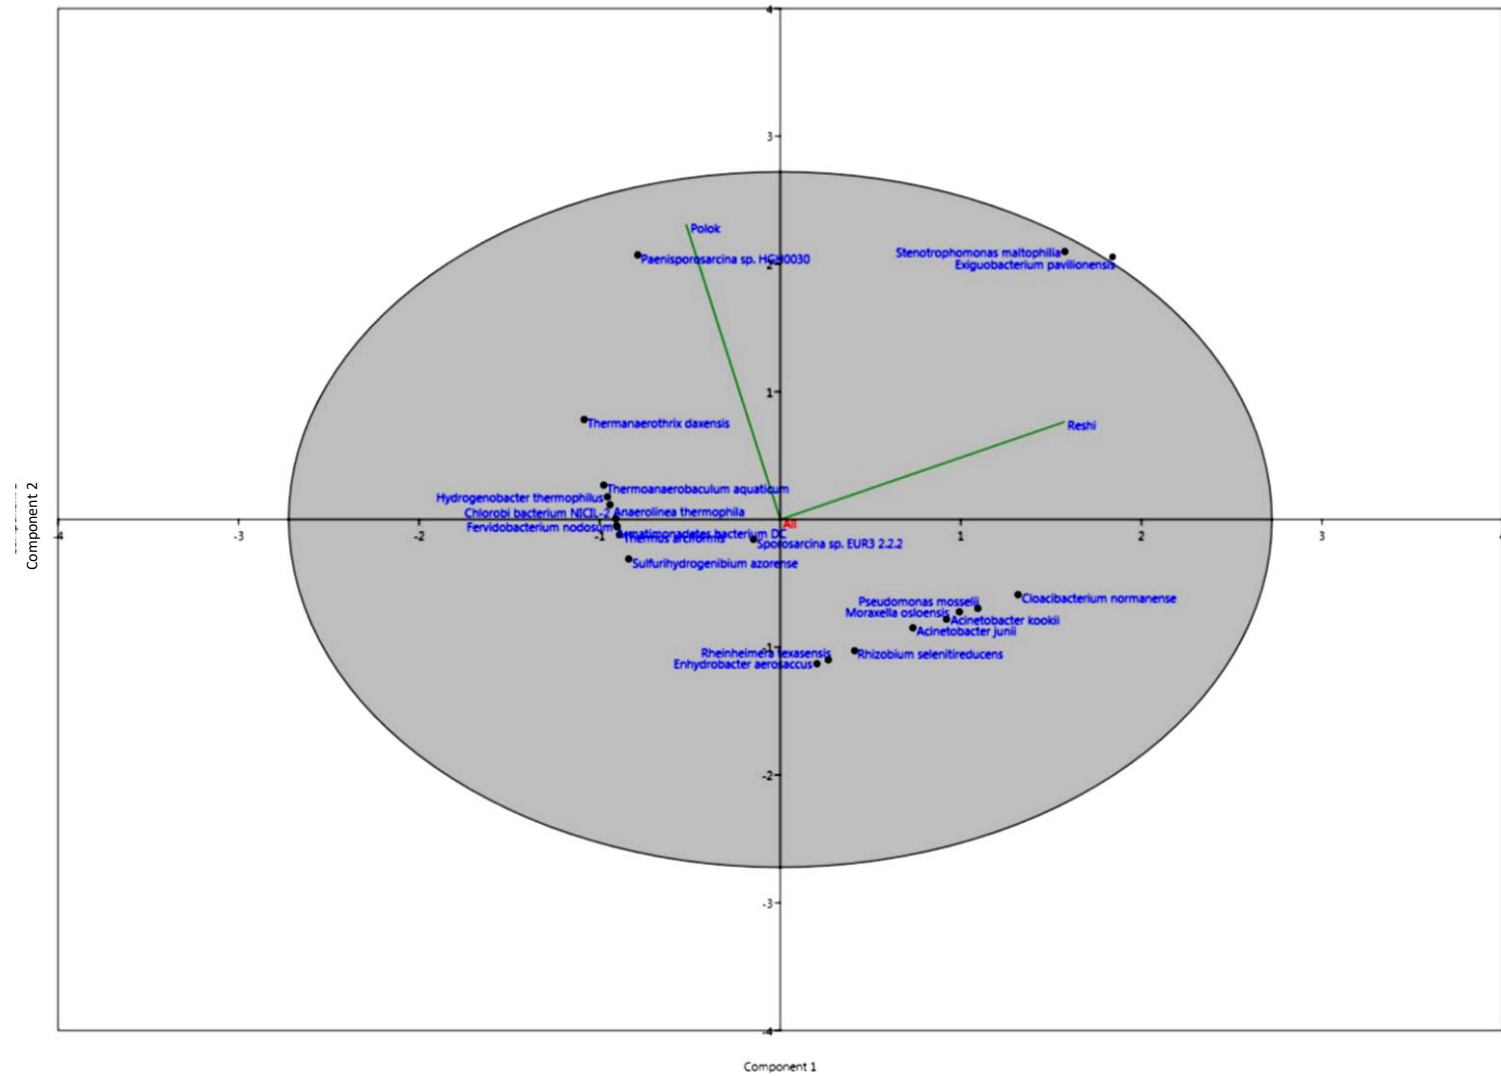

**Fig. S5.** Principle component analysis (PCA) at species level.

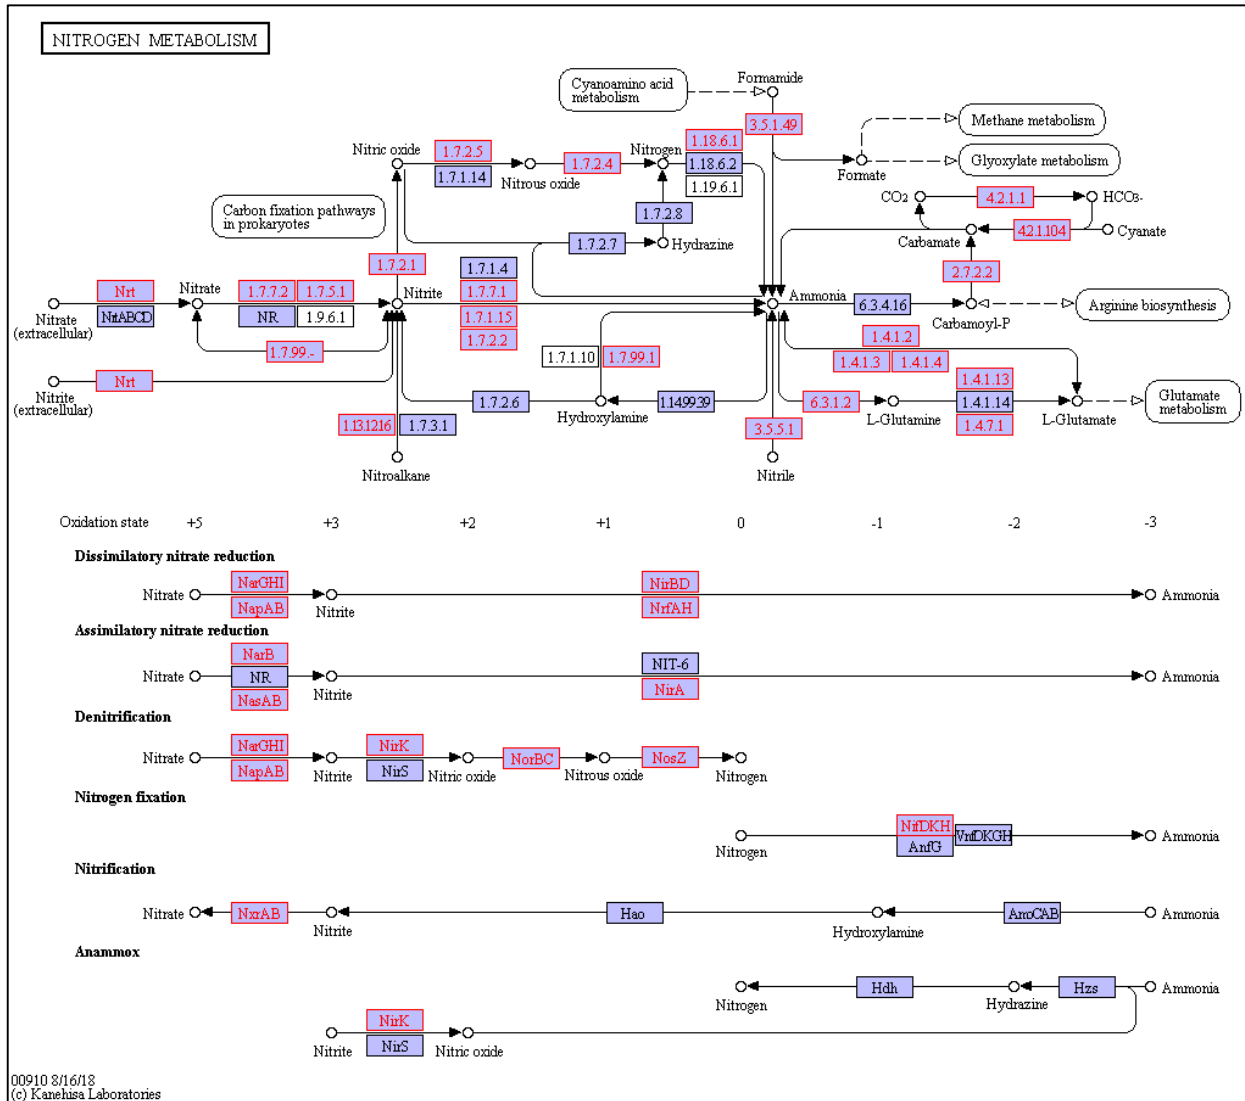

00910 8/16/13  
(c) Kanehisa Laboratories

**Fig. S6.** Metagenomic genes mapped to nitrogen metabolism.

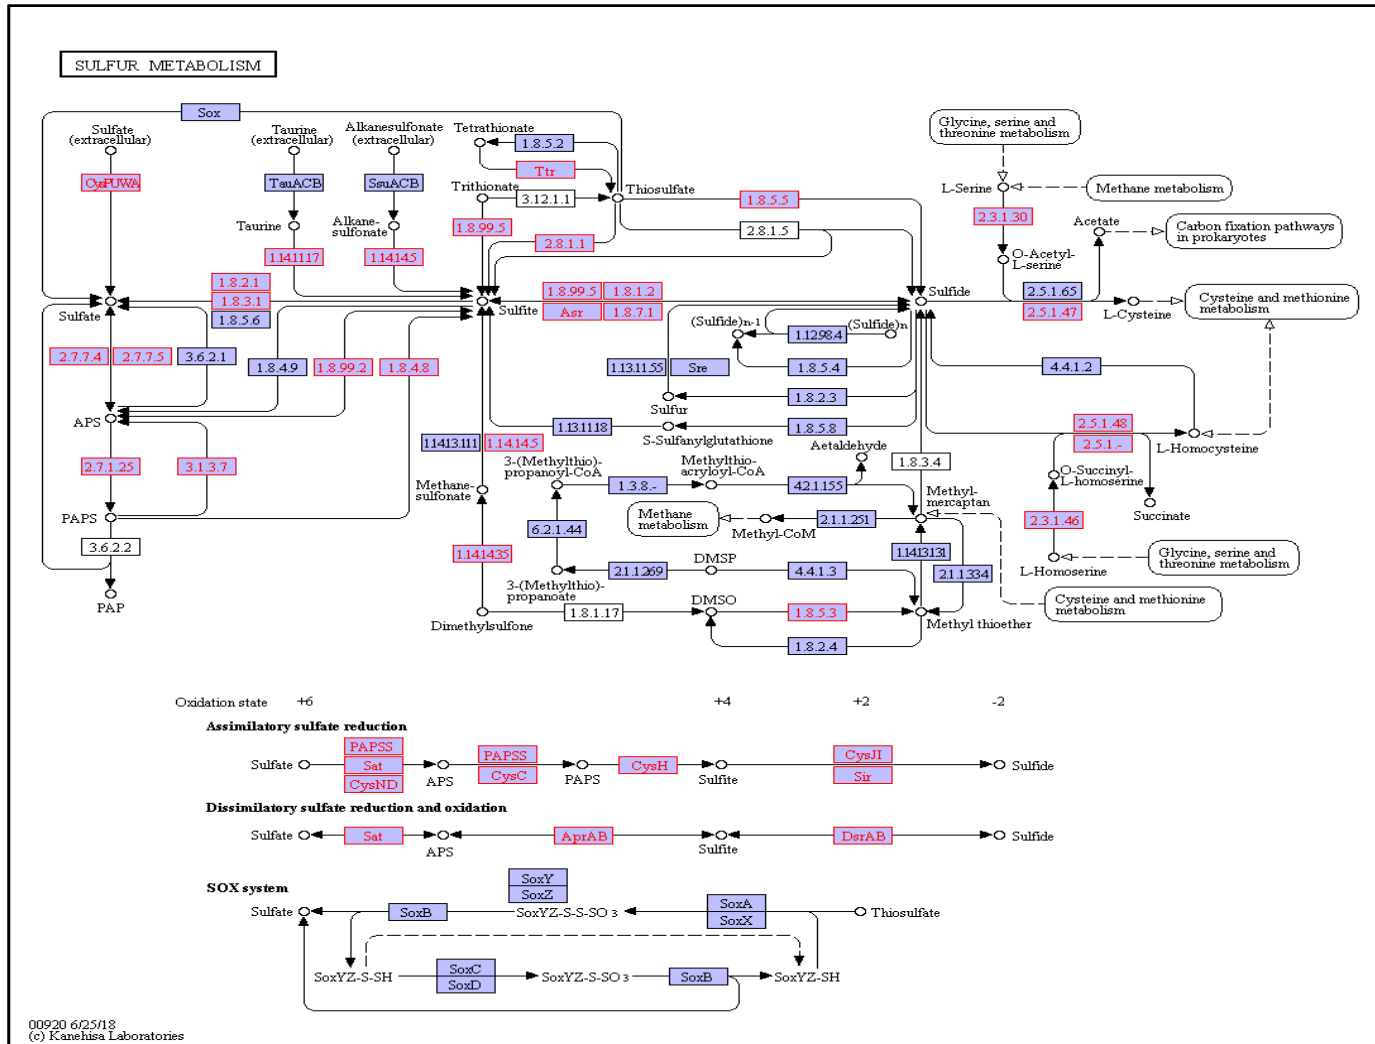

**Fig. S7.** Metagenomic genes mapped to sulphur metabolism.

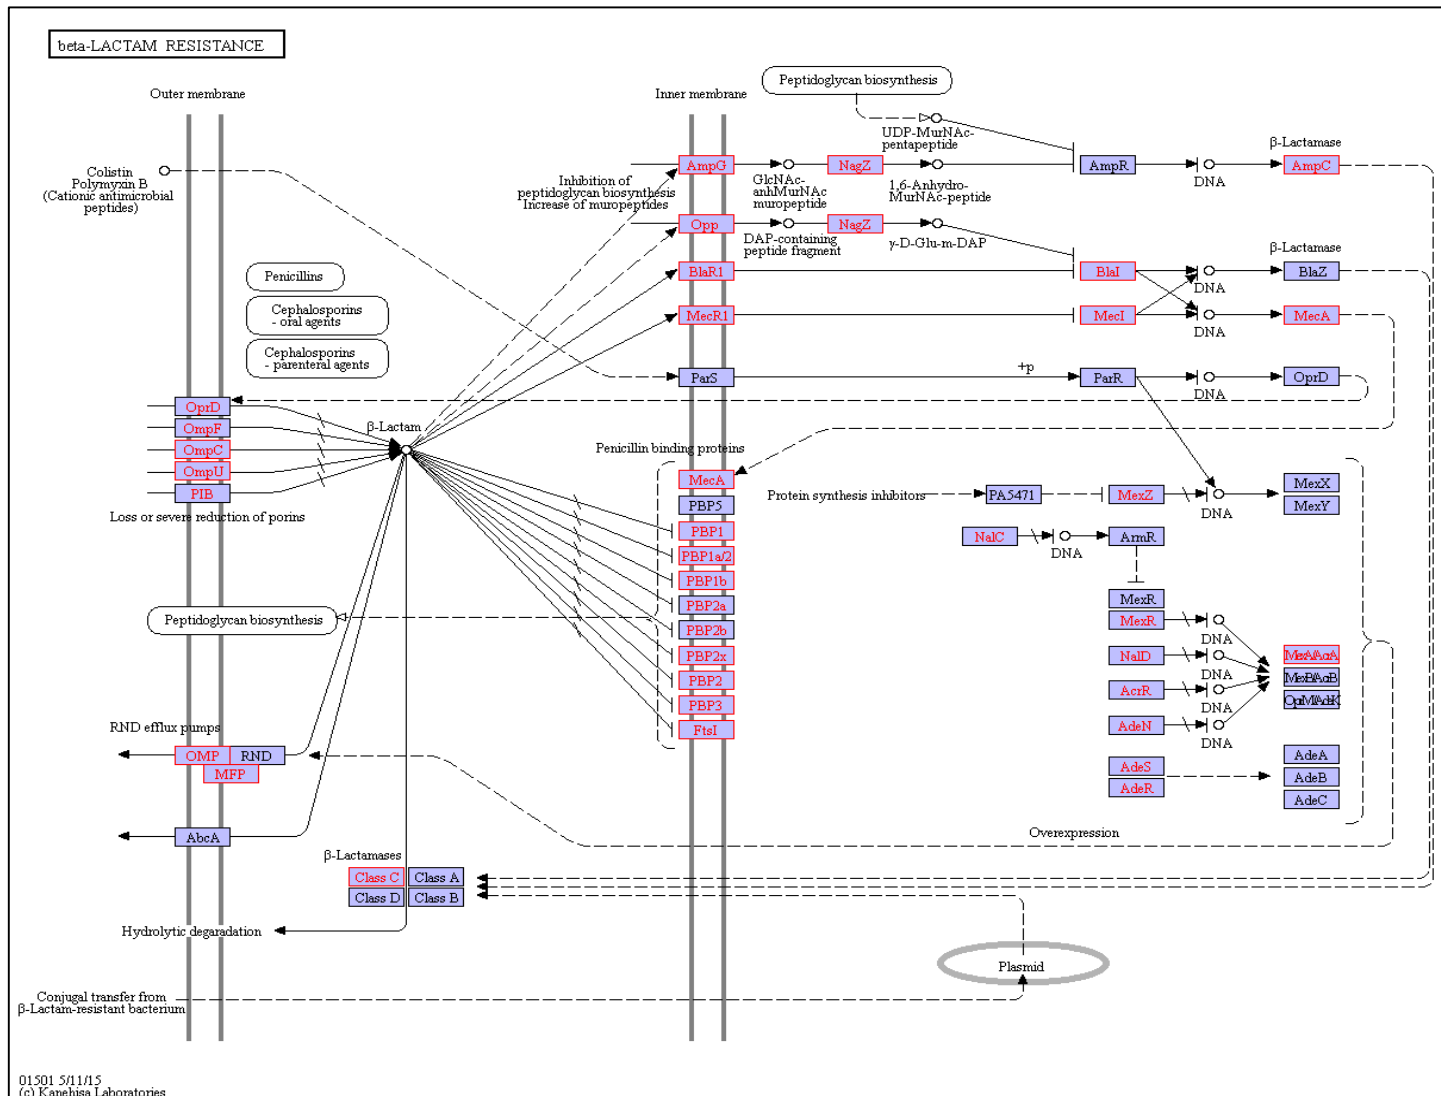

**Fig. S8.** Metagenomic genes mapped to beta-Lactam resistance pathway.



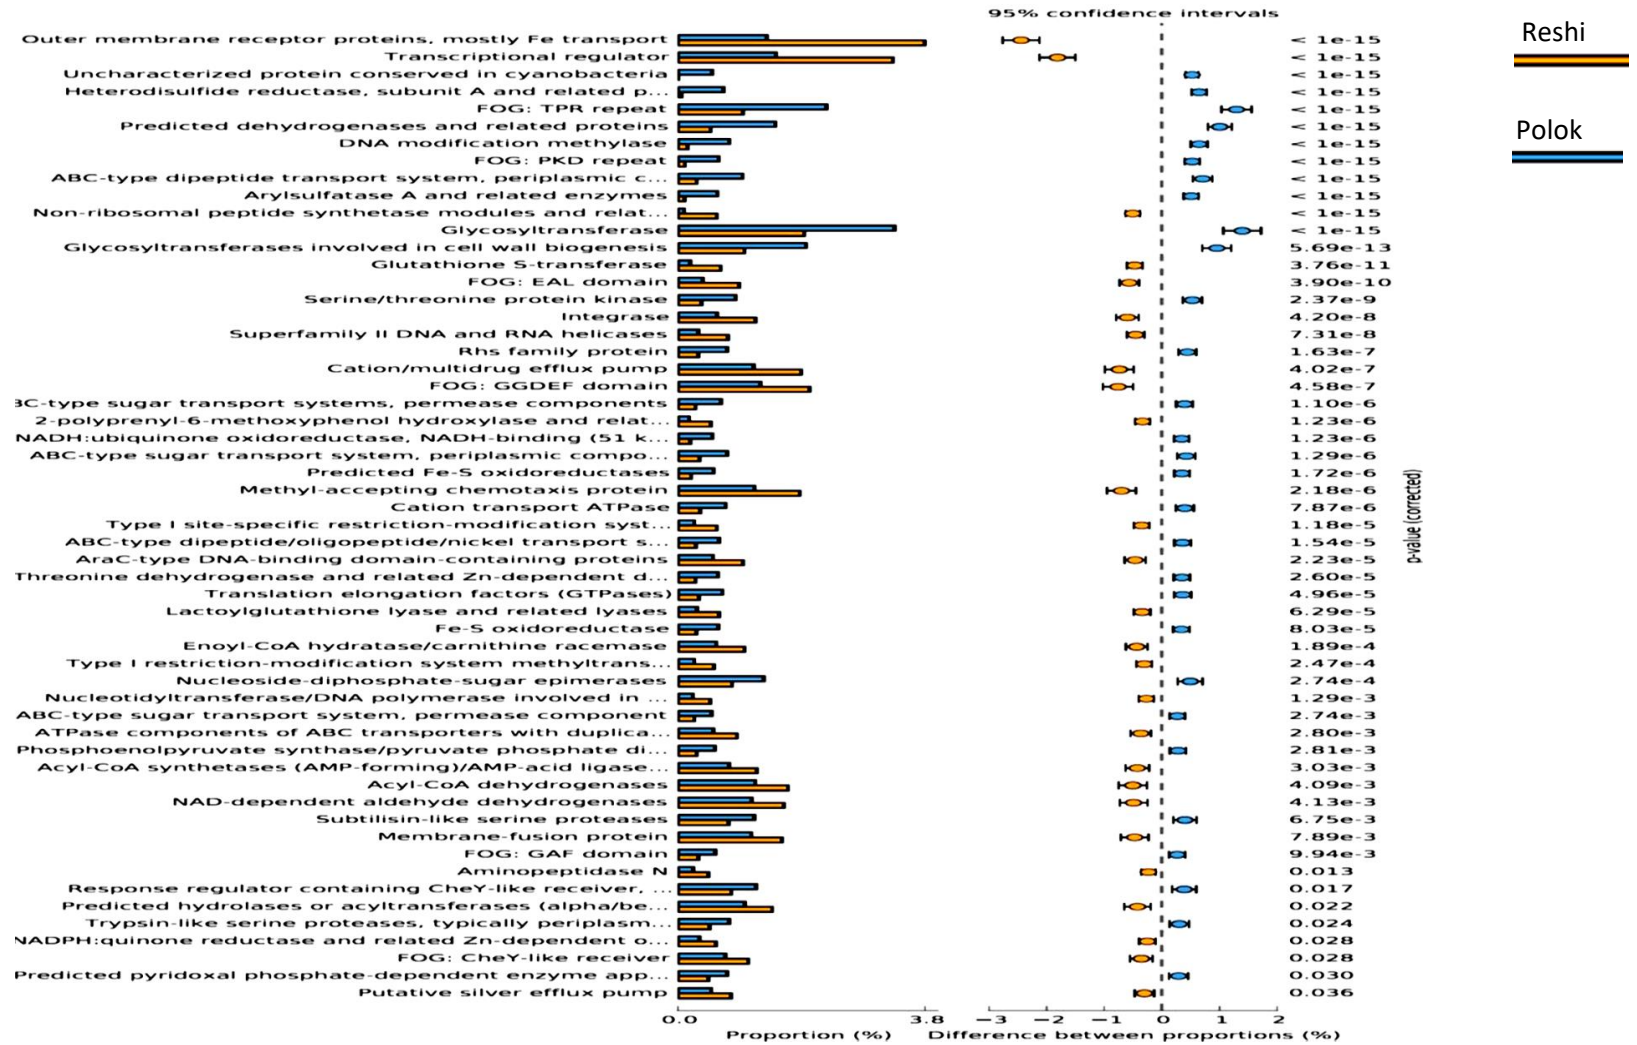

**Fig. S9.** ORFs mapped to top 100 COG functions in the metagenome. Differential proportion of ORFs is statistically validated by STAMP tool using Fisher exact test with Bonferroni correction. The details of ORF distribution are given in Table S17.
